# Supplementary material for: VKORC1 and Novel CYP2C9 Variation Predict Warfarin Response in Alaska Native and American Indian People
Source: PubMed Central journal article supplement — Clin Transl Sci. 2019 Mar 1;12(3):312–20. doi: 10.1111/cts.12611 (PMC6510382; doi:10.1111/cts.12611), 2019-03-01

Figure S1: Linkage Disequilibrium (LD) in the VKORC1 locus for rs9923231 (-1639G>A) and rs9934438 (1173C>T) SNVs in all 118 genotyped customer-owners from SCF.  $R^2$  was 1.0 for this variant pair.

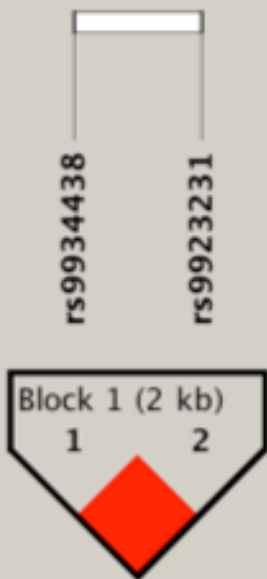

Supplement: CTS-12-312-s001.pdf [file CTS-12-312-s001.pdf]
